# Supplementary material for: Circulating Tumor Cells as a Tool of Minimal Residual Disease Can Predict Lung Cancer Recurrence: A longitudinal, Prospective Trial
Source: PubMed Central journal article supplement (PMC7151004; doi:10.3390/diagnostics10030144), 2020-03-06
Supplement: diagnostics-10-00144-s001.pdf [file diagnostics-10-00144-s001.pdf]

## Supplementary Figures

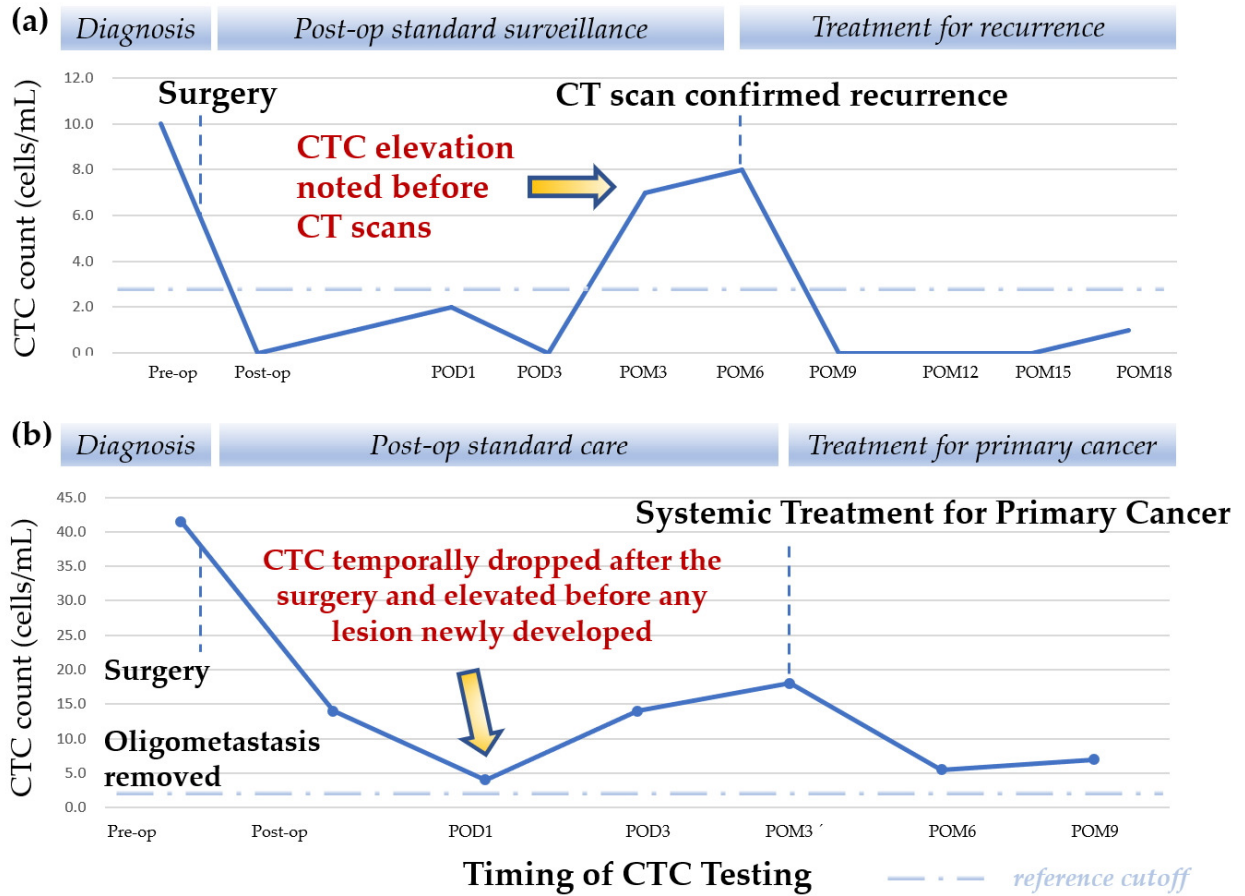

**Figure S1.** Demonstrations of Possible Role of CTC testing in lung cancer and pulmonary oligometastasis. (a) shows a representative case of CTC testing predicting the recurrence from the primary lung cancer. (b) displays the CTC dynamics during surveillance in a patient later proven to be an oligometastasis from another solid tumor.

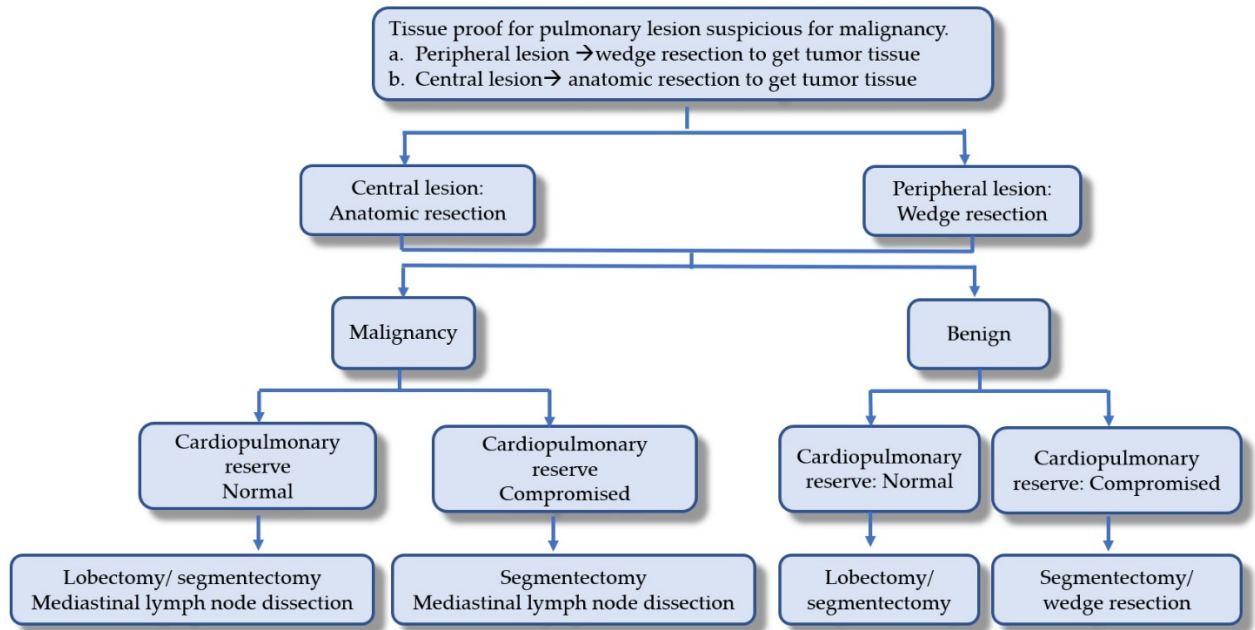

**Figure S2.** The algorithm of surgical management for pulmonary lesions with a suspicion of malignancy.

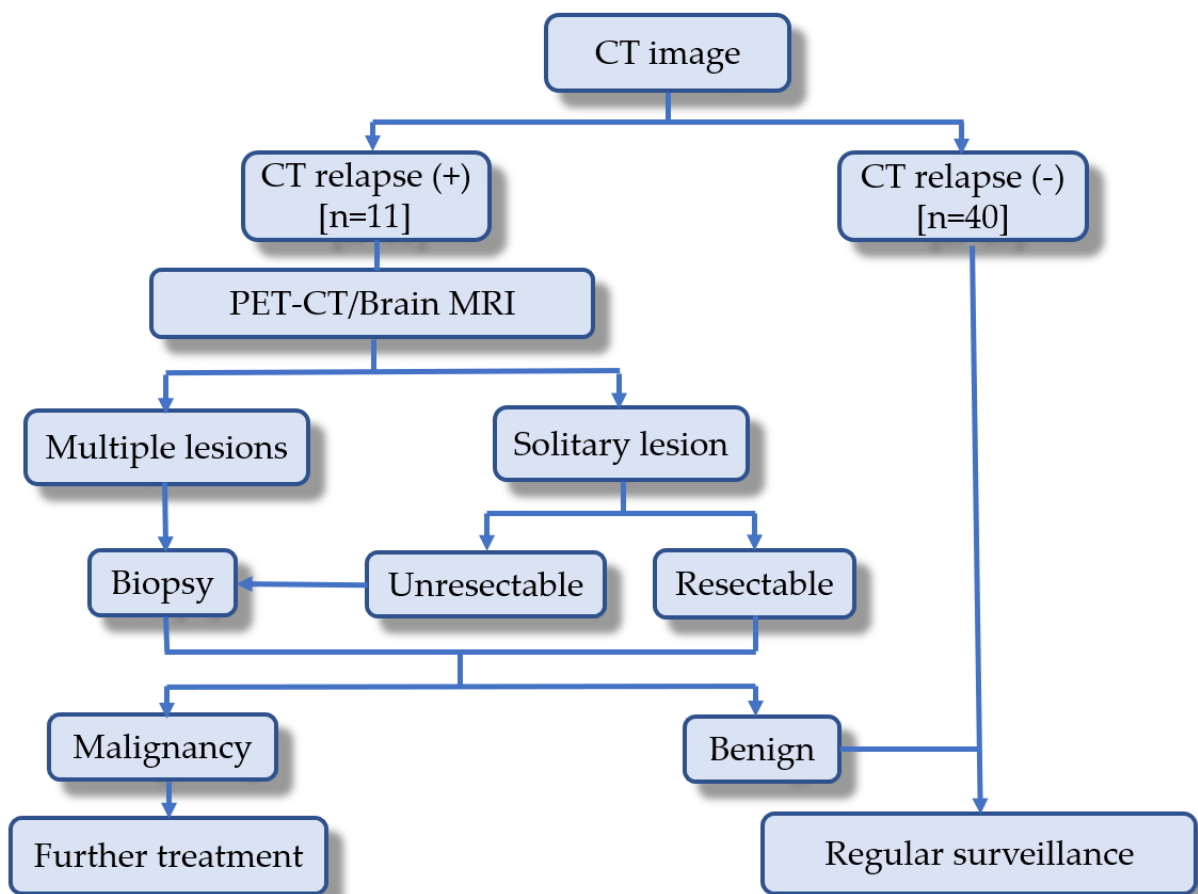

**Figure S3.** Surveillance algorithm and corresponding management for possible relapse lesions. (Abbreviations: CT, computed tomography; PET, positron emission tomography; MRI, Magnetic Resonance Imaging.).
